# Supplementary material for: Mesenchymal Stem Cell-Mediated Deep Tumor Delivery of Gold Nanorod for Photothermal Therapy
Source: MDPI journal article supplement (doi:10.3390/nano12193410), 2022-09-28
Supplement: s1 [file s1]

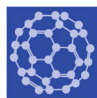

Supplementary Material

# Mesenchymal stem cell-mediated deep tumor delivery of gold nanorod for photothermal therapy

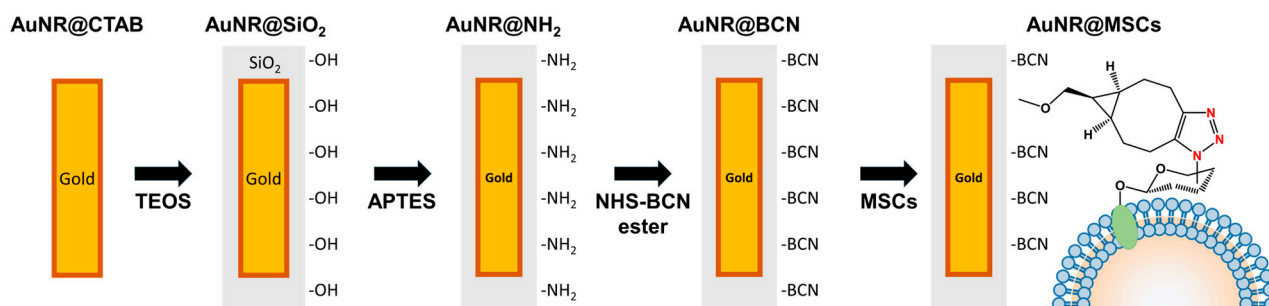

**Figure S1.** Schematic illustration to show the protocol for preparation of AuNR@MSCs.

**BCN-Cy5.5 only  
(Without Ac<sub>4</sub>ManNAz)**

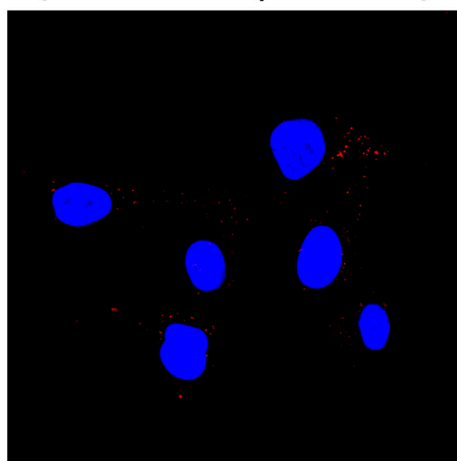

**Figure S2.** Fluorescence image of MSCs treated with BCN-Cy5.5 (without Ac<sub>4</sub>ManNAz treatment) for 48 h.

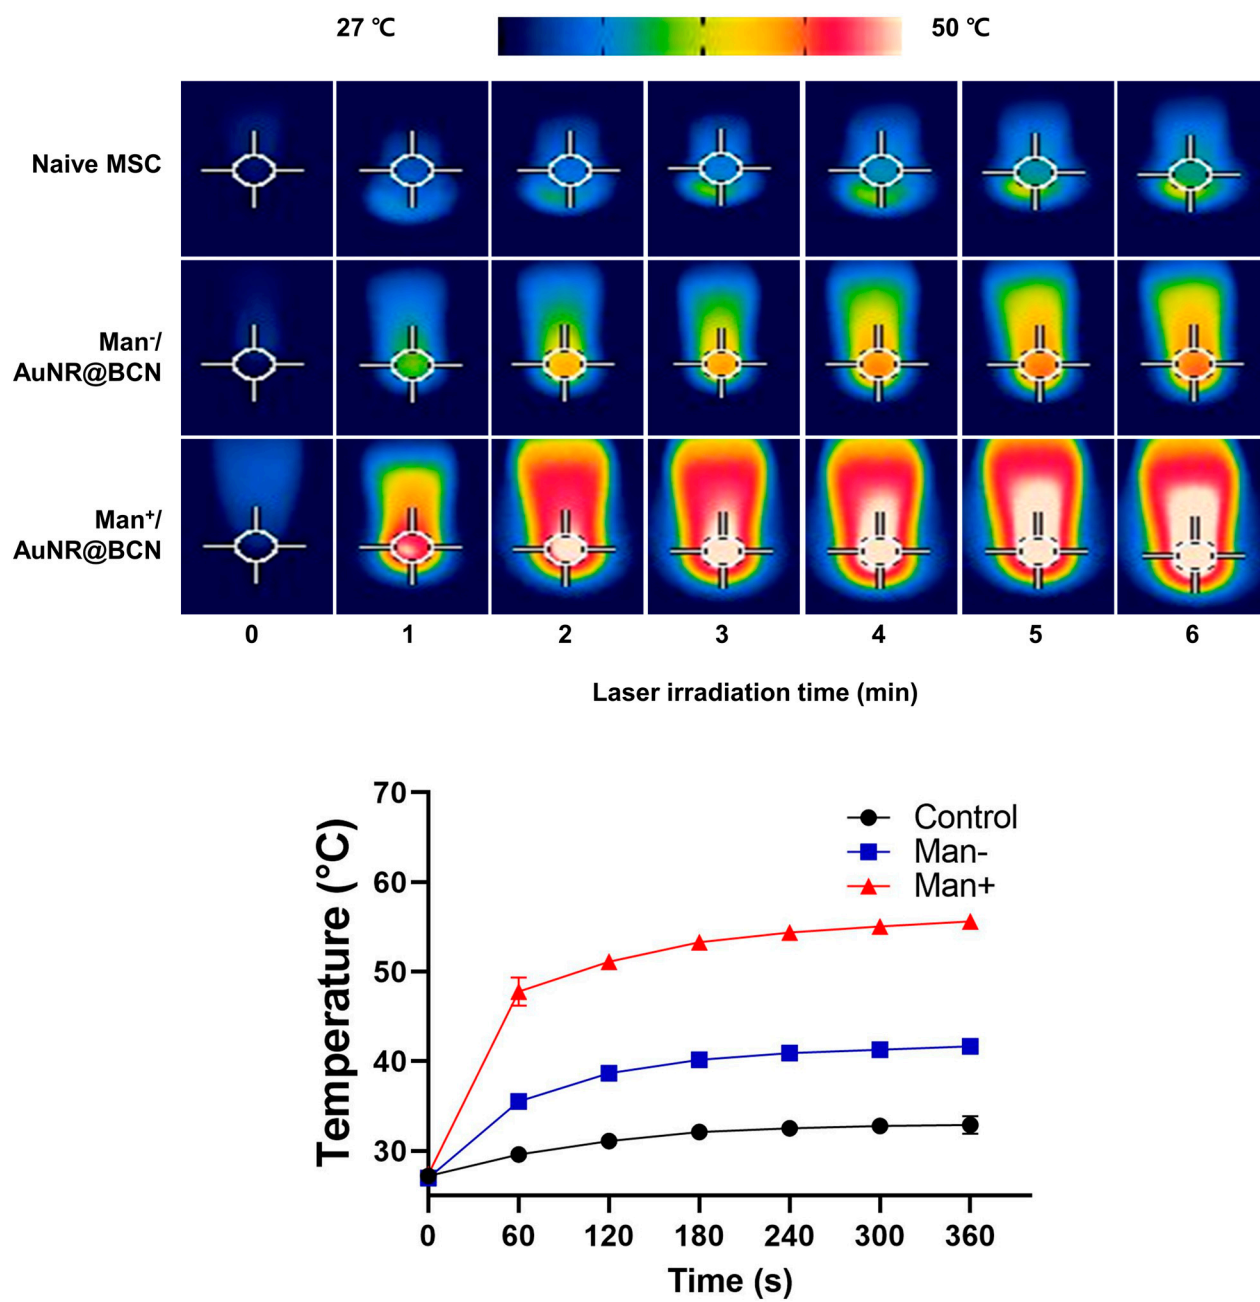

Figure S3. The photothermal efficiency of Man<sup>+</sup>/AuNR@BCN and Man<sup>-</sup>/AuNR@BCN under light irradiation with power of 1.0 W/cm<sup>2</sup>.
